# Supplementary material for: Fresh, Mechanical, and Microstructural Properties Investigation on the Combined Effect of Biomedical Waste Incinerator Ash and Bagasse Ash for High-Strength Concrete
Source: Hindawi journal article supplement (doi:10.1155/2022/5685372), 2022-05-31
Supplement: f1 [file 5685372.f1.pdf]

## Match software Phase Analysis (Diffraction Pattern Graphics)

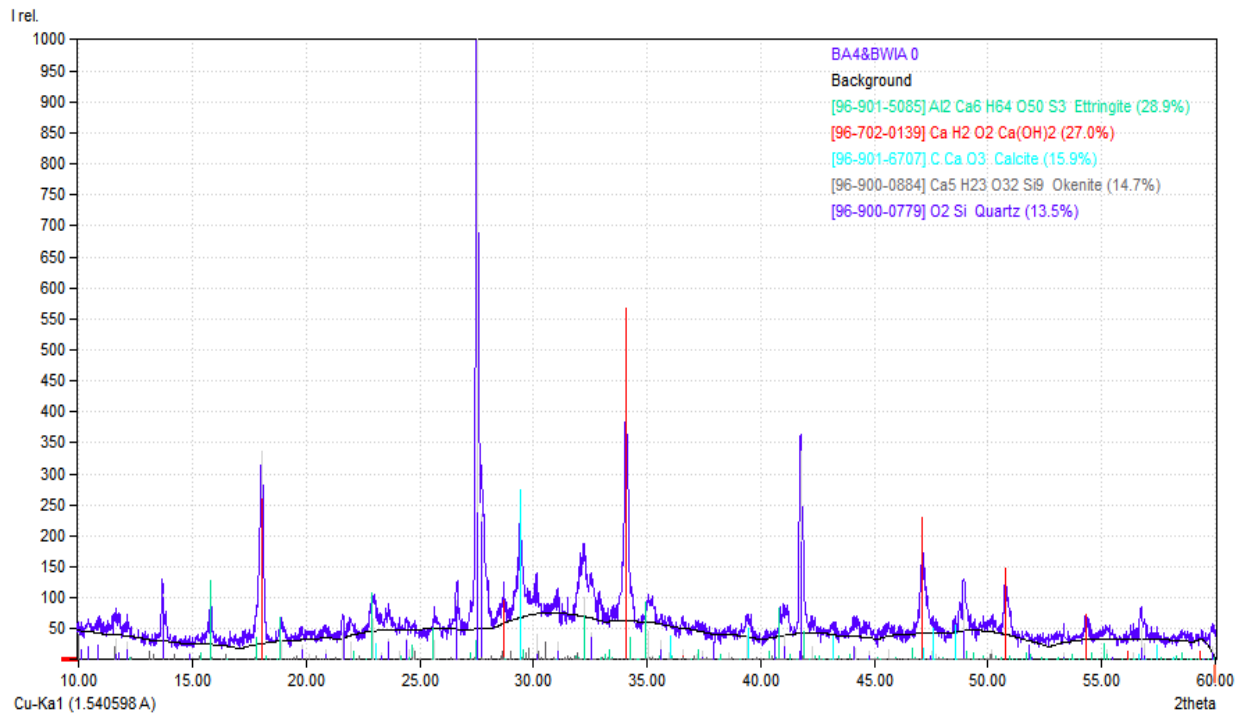

Figure 1:- Diffraction Pattern Graphics of control mix (BA and BWIA 0)

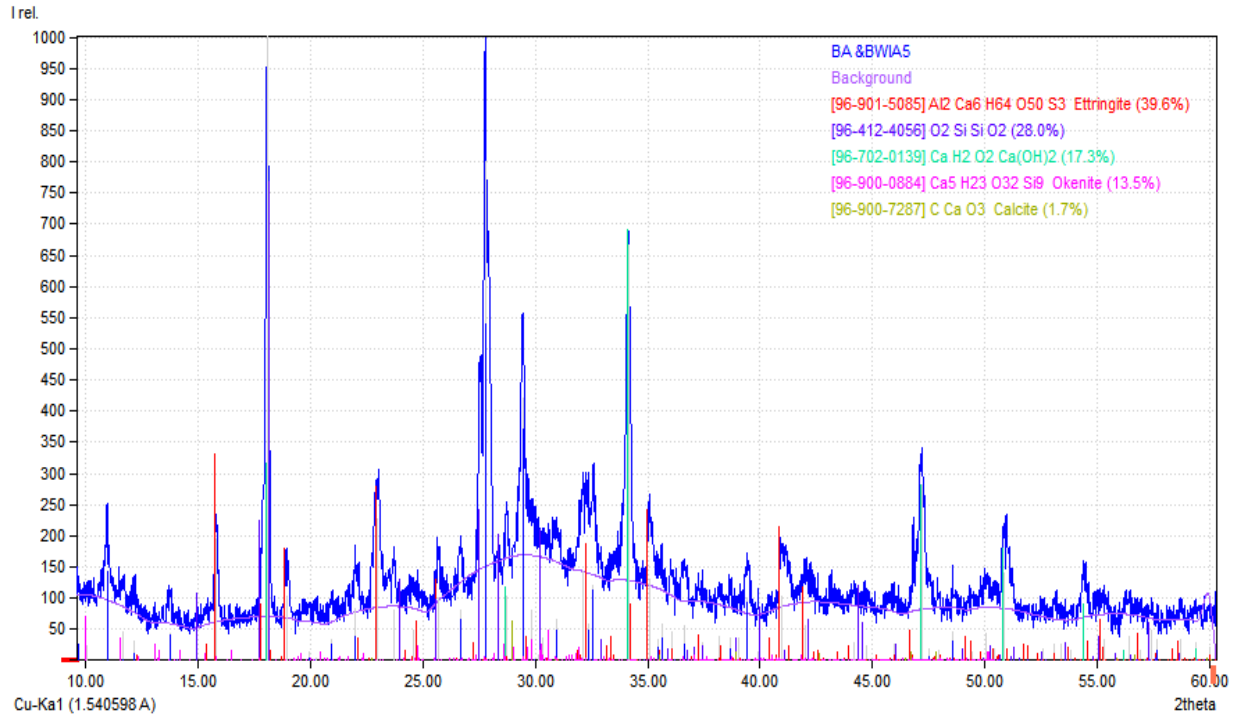

Figure 2:-Diffraction Pattern Graphics of 2.5% BA and 2.5% of BWIA mix (BA&BWIA 5)

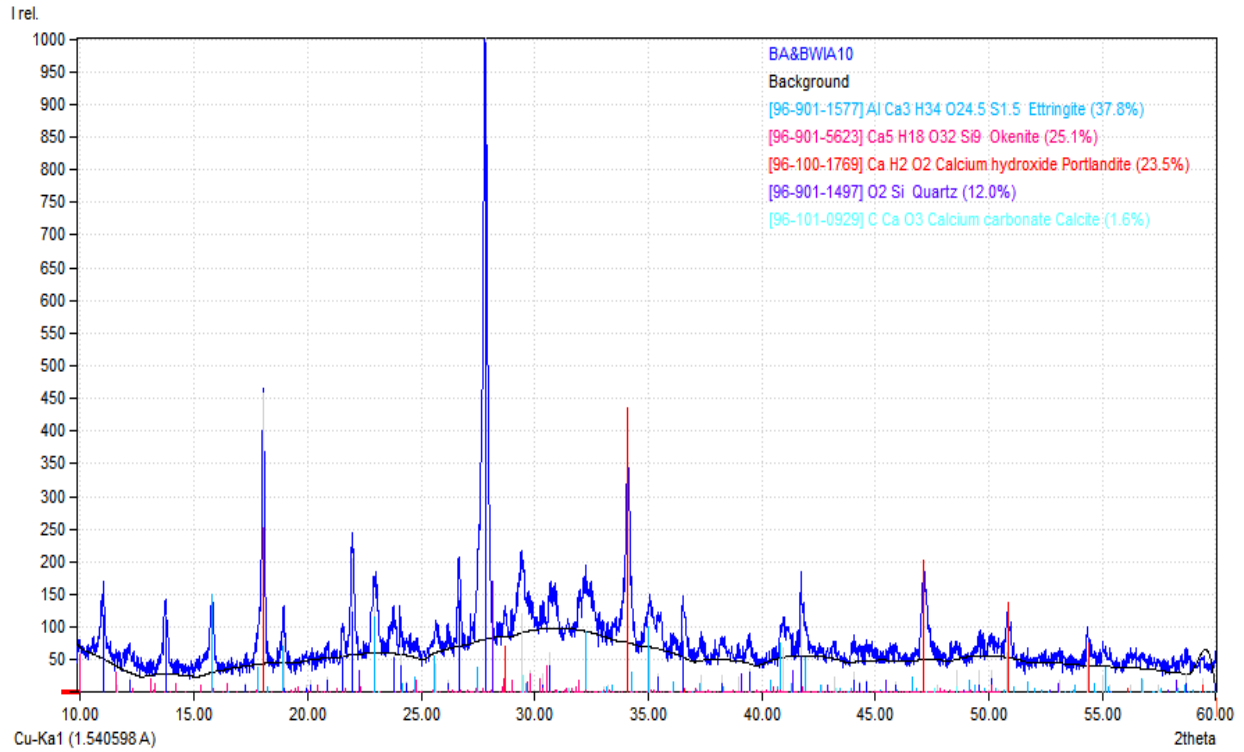

Figure 3:-Diffraction Pattern Graphics of 5% BA and 5% of BWIA mix (BA&BWIA 10)

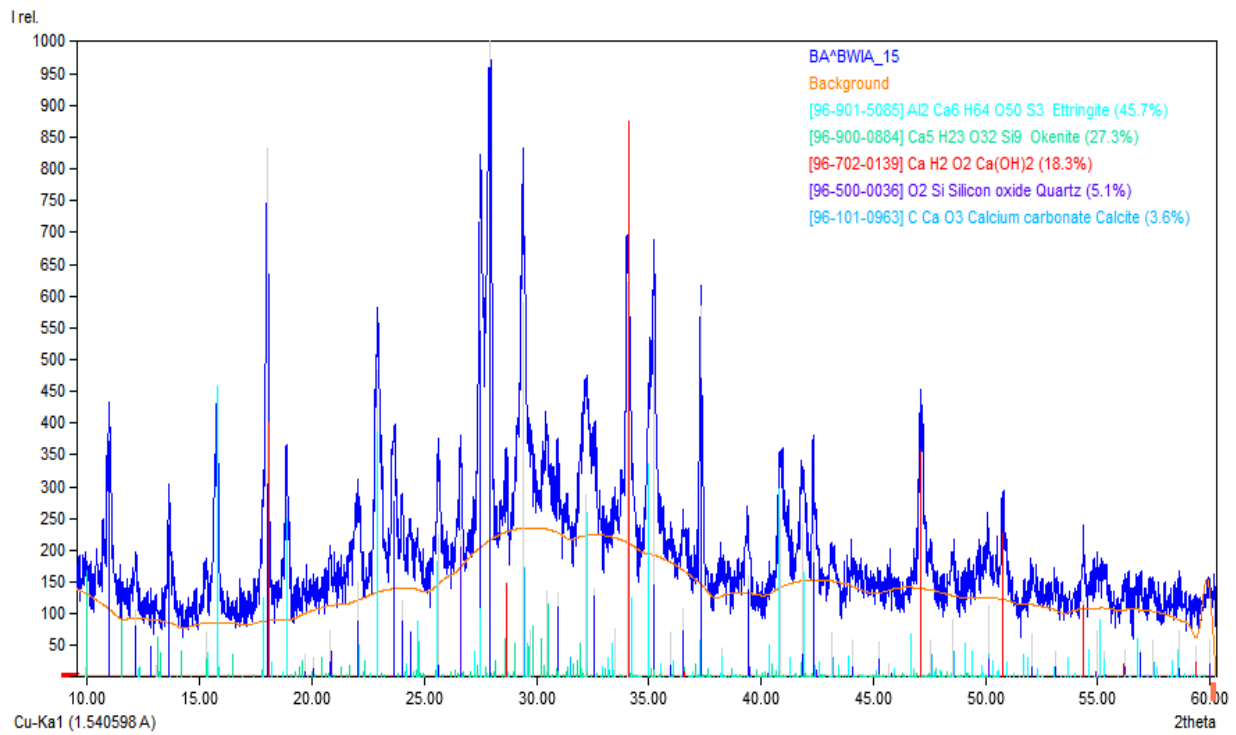

Figure 4:-Diffraction Pattern Graphics of 7.5% BA and 7.5% of BWIA mix (BA&BWIA 15)
